# Supplementary material for: Interventions to reduce medication errors in adult medical and surgical settings: a systematic review
Source: PubMed Central journal article supplement — Ther Adv Drug Saf. 2020 Nov 12;11:2042098620968309. doi: 10.1177/2042098620968309 (PMC7672746; doi:10.1177/2042098620968309), 2020-11-12
Supplement: TADS_Supplementary_file_1_20200527.pdf [file TADS_Supplementary_file_1_20200527.pdf]

## **Supplementary file 1. Search terms.**

Medline, PsycINFO, Emcare, Cochrane Central Register of Controlled Trials, Cochrane

Database of Systematic Reviews:

1. (medication adj2 error\*).mp.
2. (drug adj2 error\*).mp.
3. (medicine adj2 error\*).mp.
4. adverse drug event\*.mp.
5. 1 or 2 or 3 or 4
6. (Hospital\* or Acute medical or surgical or surgery or acute care).mp.
7. ((Adult\* or elderly or aged or geriatric) and patient\*).mp.
8. (Clinical trial\* or observational study or random\* control\* trial\* or quality improvement study or program\* or intervention\*).mp.
9. 5 and 6 and 7 and 8
10. Limit 9 to English

Embase

1. (medication adj2 error\*).mp.
2. (drug adj2 error\*).mp.
3. (medicine adj2 error\*).mp.
4. adverse drug event\*.mp.
5. 1 or 2 or 3 or 4
6. (Hospital\* or Acute medical or surgical or surgery or acute care).mp.
7. ((Adult\* or elderly or aged or geriatric) and patient\*).mp.

8. (Clinical trial\* or observational study or random\* control\* trial\* or quality improvement study or program\* or intervention\*).mp.

9. 5 and 6 and 7 and 8

10. Limit 9 to English

11. Limit 10 to (exclude medline journals and (article or article in press))
